# Supplementary material for: Australian airway clearance services for adults with chronic lung conditions: A national survey
Source: PubMed Central journal article supplement — Chron Respir Dis. 2023 Jan 27;20:14799731221150435. doi: 10.1177/14799731221150435 (PMC9903021; doi:10.1177/14799731221150435), 2023-01-27
Supplement: sj-pdf-1-crd-10.1177_14799731221150435.pdf [file sj-pdf-1-crd-10.1177_14799731221150435.pdf]

Summary of supplementary files for:

**Australian airway clearance services for adults with chronic lung conditions: a National survey.**

**Ms Laura Cooper, Associate Professor Kylie Johnston and Professor Marie Williams**

- Appendix 1 – Survey Questions
- Supplementary Data – Table 1 - Referral information of airway clearance services (ACSs) provided
- Supplementary Data – Table 2 - Service provision characteristics of airway clearance services (ACSs) provided
- Supplementary Data – Table 3 - Program metrics of airway clearance services (ACSs)
- Supplementary Data – Table 4 - Themed responses: reasons for airway clearance needs not being met by current service

**Appendix 1 – Airway Clearance Survey Questions**

| Domain                        |     | Question                                                                                                          | Answer                                                                                                                                                                                                                       | Data Type                                                                |
|-------------------------------|-----|-------------------------------------------------------------------------------------------------------------------|------------------------------------------------------------------------------------------------------------------------------------------------------------------------------------------------------------------------------|--------------------------------------------------------------------------|
| <b>1. Health care context</b> |     |                                                                                                                   |                                                                                                                                                                                                                              |                                                                          |
|                               | 1.1 | Which of the following best describes the type of organisation that provides the airway clearance service?        | <ul style="list-style-type: none"> <li>• Public health service</li> <li>• Private healthcare provider</li> <li>• Not for profit organisation</li> <li>• Research</li> <li>• Other</li> </ul>                                 | Tick a box, allows one choice only<br>“Other” allows space for free text |
|                               | 1.2 | Which of the following best describes the location of your service?                                               | <ul style="list-style-type: none"> <li>• Inner City</li> <li>• Metropolitan</li> <li>• Regional</li> <li>• Rural</li> <li>• Remote</li> </ul>                                                                                | Tick a box, allows one choice only                                       |
|                               | 1.3 | Which of the following venues does your service provide airway clearance intervention from? (tick all that apply) | <ul style="list-style-type: none"> <li>• Public hospital outpatient department</li> <li>• Private hospital</li> <li>• Community clinic</li> <li>• Primary care setting</li> <li>• Patient’s home</li> <li>• Other</li> </ul> | Tick a box, allows one choice only<br>“other” allows space for free text |
|                               | 1.4 | How many sites does your                                                                                          | <ul style="list-style-type: none"> <li>• 1</li> </ul>                                                                                                                                                                        | Tick a box,                                                              |

|                     |     |                                                                                                           |                                                                                                                                                                                                                                                                                                 |                                                                       |
|---------------------|-----|-----------------------------------------------------------------------------------------------------------|-------------------------------------------------------------------------------------------------------------------------------------------------------------------------------------------------------------------------------------------------------------------------------------------------|-----------------------------------------------------------------------|
|                     |     | service operate at?                                                                                       | <ul style="list-style-type: none"> <li>• 2</li> <li>• 3</li> <li>• 4</li> <li>• 5 or more</li> </ul>                                                                                                                                                                                            | allows one choice only                                                |
|                     | 1.5 | What is the method of airway clearance intervention service delivery? (tick all that apply)               | <ul style="list-style-type: none"> <li>• 1:1 face to face delivery</li> <li>• Group based delivery</li> <li>• Phone consultation</li> <li>• Tele-health delivery</li> <li>• Other</li> </ul>                                                                                                    | Tick a box, allows one choice only "Other" allows space for free text |
|                     |     | Does your site provide outreach PT services to other locations?                                           | <ul style="list-style-type: none"> <li>• Yes</li> <li>• No</li> </ul>                                                                                                                                                                                                                           | Tick a box, allows one choice only                                    |
|                     |     | Do these outreach services provide 1:1 airway clearance intervention?                                     | <ul style="list-style-type: none"> <li>• Yes</li> <li>• No</li> </ul>                                                                                                                                                                                                                           | Tick a box, allows one choice only                                    |
| <b>2. Referrals</b> | 2.1 | From which sources does your airway clearance service <u>accept</u> referrals from? (tick all that apply) | <ul style="list-style-type: none"> <li>• Private physicians</li> <li>• Public physicians</li> <li>• GP's</li> <li>• Nursing staff</li> <li>• Allied Health</li> <li>• Respiratory Scientists</li> <li>• Home oxygen teams</li> <li>• Self-referred</li> <li>• Other (please specify)</li> </ul> | Tick a box, allows one choice only "Other" allows space for free text |
|                     | 2.2 | Which referral sources do you receive referrals from? (tick all that apply)                               | <ul style="list-style-type: none"> <li>• Private physicians</li> <li>• Public physicians</li> <li>• GP's</li> <li>• Nursing staff</li> <li>• Allied Health</li> <li>• Respiratory Scientists</li> <li>• Home oxygen teams</li> <li>• Self-referred</li> <li>• Other (please specify)</li> </ul> | Tick a box, allows one choice only "Other" allows space for free text |
|                     | 2.3 | Which referral source do you receive the most referrals from?                                             | <ul style="list-style-type: none"> <li>• Private physicians</li> <li>• Public physicians</li> <li>• GP's</li> <li>• Nursing staff</li> <li>• Allied Health</li> </ul>                                                                                                                           | Tick a box, allows one choice only "Other" allows space for free text |

|                                                         |      |                                                                                                                              |                                                                                                                                                                    |                                                                          |
|---------------------------------------------------------|------|------------------------------------------------------------------------------------------------------------------------------|--------------------------------------------------------------------------------------------------------------------------------------------------------------------|--------------------------------------------------------------------------|
|                                                         |      |                                                                                                                              | <ul style="list-style-type: none"> <li>• Respiratory Scientists</li> <li>• Home oxygen teams</li> <li>• Self-referred</li> <li>• Other (please specify)</li> </ul> |                                                                          |
|                                                         | 2.4  | Are the patients referred on a needs basis or by blanket referral?                                                           | <ul style="list-style-type: none"> <li>• Needs basis</li> <li>• Blanket referral</li> </ul>                                                                        | Tick a box, allows one choice only                                       |
|                                                         | 2.5  | Does your service have specific inclusion criteria? If so, please list here                                                  |                                                                                                                                                                    | Free text                                                                |
|                                                         | 2.6  | Does your service have specific exclusion criteria? If so, please list here                                                  |                                                                                                                                                                    | Free text                                                                |
|                                                         | 2.7  | Approximately how many referrals did the airway clearance service receive in the year 2018?                                  | <ul style="list-style-type: none"> <li>• &lt;30</li> <li>• 31-60</li> <li>• 61-90</li> <li>• 91-120</li> <li>• 120+</li> </ul>                                     | Tick a box, allows one choice only                                       |
|                                                         | 2.8  | How were referrals to the airway clearance service received? (tick all that apply)                                           | <ul style="list-style-type: none"> <li>• Email</li> <li>• Fax</li> <li>• Paper form</li> <li>• Phone</li> <li>• Electronic database</li> </ul>                     | Tick all that apply                                                      |
|                                                         | 2.9  | Which conditions would be accepted by your airway clearance service? (tick all that apply)                                   | <ul style="list-style-type: none"> <li>• COPD</li> <li>• Asthma</li> <li>• Bronchiectasis</li> <li>• ILD</li> <li>• Lung cancer</li> <li>• Other</li> </ul>        | Tick a box, allows one choice only<br>"Other" allows space for free text |
|                                                         | 2.10 | Please rank the three conditions most frequently referred to your service in 2018, with 1 being the most frequently referred | <ul style="list-style-type: none"> <li>• COPD</li> <li>• Asthma</li> <li>• Bronchiectasis</li> <li>• ILD</li> <li>• Lung cancer</li> <li>• Other</li> </ul>        | Number accordingly                                                       |
|                                                         | 2.11 | Does your service triage referrals into categories of urgency?                                                               | <ul style="list-style-type: none"> <li>• Yes</li> <li>• No</li> </ul>                                                                                              | Tick a box, allows one choice only                                       |
| <b>3. Service provision (include staffing, funding)</b> | 3.1  | Is there a waiting time for patients to be seen by the airway clearance service?                                             | <ul style="list-style-type: none"> <li>• Yes</li> <li>• No</li> </ul>                                                                                              | Tick a box, allows one choice only                                       |
|                                                         | 3.2  | If so, which of the following best describes an average wait time?                                                           | <ul style="list-style-type: none"> <li>• &lt; 1 week</li> <li>• 1-3 weeks</li> <li>• 3-6 weeks</li> </ul>                                                          | Tick a box, allows one choice only                                       |

|  |     |                                                                                                               |                                                                                                                                                                                                                                                                                                                                                                                                                                           |                                                                          |
|--|-----|---------------------------------------------------------------------------------------------------------------|-------------------------------------------------------------------------------------------------------------------------------------------------------------------------------------------------------------------------------------------------------------------------------------------------------------------------------------------------------------------------------------------------------------------------------------------|--------------------------------------------------------------------------|
|  |     |                                                                                                               | <ul style="list-style-type: none"> <li>• 6 weeks -3 months</li> <li>• 3 months+</li> </ul>                                                                                                                                                                                                                                                                                                                                                |                                                                          |
|  | 3.3 | How long is allocated for an initial appointment?                                                             | <ul style="list-style-type: none"> <li>• 15 mins</li> <li>• 30 mins</li> <li>• 45 mins</li> <li>• 60 mins</li> <li>• &gt;60 mins</li> </ul>                                                                                                                                                                                                                                                                                               | Tick a box, allows one choice only                                       |
|  | 3.4 | How long is allocated for a review appointment?                                                               | <ul style="list-style-type: none"> <li>• 15 mins</li> <li>• 30 mins</li> <li>• 45 mins</li> <li>• 60 mins</li> <li>• &gt;60 mins</li> </ul>                                                                                                                                                                                                                                                                                               | Tick a box, allows one choice only                                       |
|  | 3.5 | Does your airway clearance service have regular set clinic hours or are appointments made on an ad hoc basis? | <ul style="list-style-type: none"> <li>• Regular set clinic times</li> <li>• Ad hoc appointments</li> </ul>                                                                                                                                                                                                                                                                                                                               | Tick a box, allows one choice only                                       |
|  | 3.6 | How is your airway clearance service funded?                                                                  | <ul style="list-style-type: none"> <li>• Operational budget</li> <li>• Activity based funding</li> <li>• Project / research grant</li> <li>• Do not know</li> </ul>                                                                                                                                                                                                                                                                       | Tick a box, allows one choice only                                       |
|  | 3.7 | Is there a cost for patients to attend the airway clearance service?                                          | <ul style="list-style-type: none"> <li>• Yes</li> <li>• No</li> </ul>                                                                                                                                                                                                                                                                                                                                                                     | Tick a box, allows one choice only                                       |
|  | 3.8 | If airway clearance devices are prescribed how are they funded?                                               | <ul style="list-style-type: none"> <li>• Patient funded</li> <li>• Program funded</li> <li>• Other</li> </ul>                                                                                                                                                                                                                                                                                                                             | Tick a box, allows one choice only<br>"Other" allows space for free text |
|  | 3.9 | Which airway clearance devices does your service have access to? (tick all that apply)                        | <ul style="list-style-type: none"> <li>• Flutter</li> <li>• Pari-O-Pep</li> <li>• Turboforte</li> <li>• PEPE</li> <li>• Acapella Blue</li> <li>• Acapella Green</li> <li>• Acapella Duet</li> <li>• Acapella Choice</li> <li>• RC-Cornet</li> <li>• Aerobika</li> <li>• Aeroeclipse</li> <li>• Bottle PEP</li> <li>• Therabubble</li> <li>• Pari PEP System 1</li> <li>• Pari PEP S</li> <li>• TheraPEP</li> <li>• PARI Sprint</li> </ul> | Tick a box, allows one choice only<br>"Other" allows space for free text |

|  |      |                                                                                                                  |                                                                                                                                                                                                                                                                                                                                 |                                                                          |
|--|------|------------------------------------------------------------------------------------------------------------------|---------------------------------------------------------------------------------------------------------------------------------------------------------------------------------------------------------------------------------------------------------------------------------------------------------------------------------|--------------------------------------------------------------------------|
|  |      |                                                                                                                  | <ul style="list-style-type: none"> <li>• PARI Sprint Star</li> <li>• PARI LC Plus</li> <li>• Other</li> </ul>                                                                                                                                                                                                                   |                                                                          |
|  | 3.10 | On average how many one on one assessment/education sessions would your patients receive in a course of therapy? | <ul style="list-style-type: none"> <li>• 1 visit</li> <li>• 2-3 visits</li> <li>• 4-5 visits</li> <li>• 6-7 visits</li> <li>• 8+ visits</li> </ul>                                                                                                                                                                              | Tick a box, allows one choice only                                       |
|  | 3.11 | Which of the following clinicians / programs does your service have access to? (tick all that apply)             | <ul style="list-style-type: none"> <li>• Pulmonary Rehabilitation</li> <li>• Respiratory Nurse</li> <li>• Speech pathology</li> <li>• Occupational Therapy</li> <li>• Psychology</li> <li>• Dietetics</li> <li>• Exercise Physiology</li> <li>• Social Work</li> <li>• Incontinence Physiotherapist</li> <li>• Other</li> </ul> | Tick a box, allows one choice only<br>"Other" allows space for free text |
|  | 3.12 | Which of the following clinicians / programs do you refer airway clearance patients to? (tick all that apply)    | <ul style="list-style-type: none"> <li>• Pulmonary Rehabilitation</li> <li>• Respiratory Nurse</li> <li>• Speech pathology</li> <li>• Occupational Therapy</li> <li>• Psychology</li> <li>• Dietetics</li> <li>• Exercise Physiology</li> <li>• Social Work</li> <li>• Incontinence Physiotherapist</li> <li>• Other</li> </ul> | Tick a box, allows one choice only<br>"Other" allows space for free text |
|  | 3.13 | Do you routinely follow the patients up at regular intervals, for example 6 or 12 monthly?                       | <ul style="list-style-type: none"> <li>• Yes</li> <li>• No</li> <li>• Comment (optional)</li> </ul>                                                                                                                                                                                                                             | Tick a box, allows one choice only<br>"Other" allows space for free text |
|  | 3.14 | Which medical professionals do you have access to if you are concerned about your airway clearance patient?      | <ul style="list-style-type: none"> <li>• Respiratory specialist</li> <li>• Medical officer</li> <li>• General Practitioner</li> </ul>                                                                                                                                                                                           | Tick a box, allows one choice only<br>"Other" allows space for           |

|                                      |      |                                                                                                                                          |                                                                                                                                                                                                                      |                                                                          |
|--------------------------------------|------|------------------------------------------------------------------------------------------------------------------------------------------|----------------------------------------------------------------------------------------------------------------------------------------------------------------------------------------------------------------------|--------------------------------------------------------------------------|
|                                      |      |                                                                                                                                          | <ul style="list-style-type: none"> <li>• Respiratory Nurse</li> <li>• Medical emergency team</li> <li>• Ambulatory Care team</li> <li>• Other</li> </ul>                                                             | free text                                                                |
|                                      | 3.15 | Which intervention categories best describe the format of the service? (tick all that apply)                                             | <ul style="list-style-type: none"> <li>• Education</li> <li>• Exercise prescription</li> <li>• Device prescription</li> </ul>                                                                                        | Tick a box, allows one choice only                                       |
|                                      | 3.16 | Are educational resources provided? In what form?                                                                                        | <ul style="list-style-type: none"> <li>• Paper based</li> <li>• Web based</li> <li>• Other</li> </ul>                                                                                                                | Tick a box, allows one choice only<br>"Other" allows space for free text |
|                                      | 3.17 | Which health professionals provide the airway clearance service? (tick all that apply)                                                   | <ul style="list-style-type: none"> <li>• Physiotherapists</li> <li>• Occupational therapists</li> <li>• Respiratory nurses</li> </ul>                                                                                | Tick a box, allows one choice only                                       |
|                                      | 3.18 | Is the service provided by generalist physiotherapists (see a range of client types) or dedicated cardiorespiratory physiotherapy staff? | <ul style="list-style-type: none"> <li>• Generalist Physiotherapists</li> <li>• Cardiorespiratory Physiotherapists</li> <li>• Other</li> </ul>                                                                       | Tick a box, allows one choice only<br>"Other" allows space for free text |
|                                      | 3.19 | Approximately how many health professional hours were spent providing airway clearance per week in 2018?                                 |                                                                                                                                                                                                                      | Free text                                                                |
|                                      | 3.20 | Is there administrative support for your service?                                                                                        | <ul style="list-style-type: none"> <li>• Yes</li> <li>• No</li> </ul>                                                                                                                                                | Tick a box, allows one choice only                                       |
|                                      | 3.21 | If so, how many hours per week is the administrative support available?                                                                  | <ul style="list-style-type: none"> <li>• 1-5 hours</li> <li>• 6-15 hours</li> <li>• 16-25 hours</li> <li>• 26-38 hours</li> </ul>                                                                                    | Tick a box, allows one choice only                                       |
| <b>4. Outcomes / Program Metrics</b> | 4.1  | Does your service focus on: (tick all that apply)                                                                                        | <ul style="list-style-type: none"> <li>• Hospital avoidance</li> <li>• Reducing length of stay</li> <li>• Chronic condition self-management</li> <li>• Management of acute exacerbations</li> <li>• Other</li> </ul> | Tick a box, allows one choice only<br>"Other" allows space for free text |

|  |     |                                                                                                                 |                                                                                                                                                                                                                                                                                                                                                                           |                                                                          |
|--|-----|-----------------------------------------------------------------------------------------------------------------|---------------------------------------------------------------------------------------------------------------------------------------------------------------------------------------------------------------------------------------------------------------------------------------------------------------------------------------------------------------------------|--------------------------------------------------------------------------|
|  | 4.2 | Which measures, if any, of health care utilisation do you record? (tick all that apply)                         | <ul style="list-style-type: none"> <li>• Number of GP visits</li> <li>• Number of hospital presentations</li> <li>• Number of hospital admissions</li> <li>• Number of specialist appointments?</li> </ul>                                                                                                                                                                | Tick a box, allows one choice only                                       |
|  | 4.3 | If health care utilisation data is recorded for your patients, how long is it captured for before intervention? | <ul style="list-style-type: none"> <li>• 3 months</li> <li>• 6 months</li> <li>• 12 months</li> <li>• Other</li> </ul>                                                                                                                                                                                                                                                    | Tick a box, allows one choice only<br>"Other" allows space for free text |
|  | 4.4 | If health care utilisation data is recorded for your patients, how long is it captured for after intervention?  | <ul style="list-style-type: none"> <li>• 3 months</li> <li>• 6 months</li> <li>• 12 months</li> <li>• Other</li> </ul>                                                                                                                                                                                                                                                    | Tick a box, allows one choice only<br>"Other" allows space for free text |
|  | 4.5 | Which, if any, measures of functional exercise capacity are used? (tick all that apply)                         | <ul style="list-style-type: none"> <li>• 6MWT</li> <li>• 4MGS</li> <li>• Other</li> </ul>                                                                                                                                                                                                                                                                                 | Tick a box, allows one choice only<br>"Other" allows space for free text |
|  | 4.6 | Which if any measures of health status do you use? (tick all that apply)                                        | <ul style="list-style-type: none"> <li>• COPD Assessment Tool</li> <li>• The Quality Of Life Questionnaire - Bronchiectasis</li> <li>• 12-Item Short Form Health Survey (SF-12)</li> <li>• 36-Item Short Form Health Survey (SF-36)</li> <li>• St Georges Respiratory Questionnaire (SGRQ)</li> <li>• Chronic Respiratory Questionnaire (CRQ)</li> <li>• Other</li> </ul> | Tick a box, allows one choice only<br>"Other" allows space for free text |

|  |      |                                                                                                                                     |                                                                                                                                    |                                                                          |
|--|------|-------------------------------------------------------------------------------------------------------------------------------------|------------------------------------------------------------------------------------------------------------------------------------|--------------------------------------------------------------------------|
|  | 4.7  | Do you use any other outcome measures routinely with your patients? Please list                                                     |                                                                                                                                    | Free text                                                                |
|  | 4.8  | Are all outcome measures measured before and after intervention where possible?                                                     | <ul style="list-style-type: none"> <li>• Before only</li> <li>• After only</li> <li>• Before and after</li> <li>• Other</li> </ul> | Tick a box, allows one choice only<br>“Other” allows space for free text |
|  | 4.9  | Do your patients have the opportunity to provide feedback on the service?                                                           | <ul style="list-style-type: none"> <li>• Yes</li> <li>• No</li> </ul>                                                              | Tick a box, allows one choice only                                       |
|  | 4.10 | If so, how is feedback provided?                                                                                                    | <ul style="list-style-type: none"> <li>• Verbal</li> <li>• Written</li> <li>• Other</li> </ul>                                     | Tick a box, allows one choice only<br>“Other” allows space for free text |
|  | 4.11 | Does your service inform referrers of the outcome of the service for each patient routinely?                                        | <ul style="list-style-type: none"> <li>• Yes</li> <li>• No</li> </ul>                                                              | Tick a box, allows one choice only                                       |
|  | 4.12 | Does your service inform the GP of the outcome of the service for each patient routinely?                                           | <ul style="list-style-type: none"> <li>• Yes</li> <li>• No</li> </ul>                                                              | Tick a box, allows one choice only                                       |
|  | 4.13 | Do you feel that the current airway clearance service and how it operates meets the needs of the respiratory cohort in your region? | <ul style="list-style-type: none"> <li>• Yes</li> <li>• No</li> <li>• If no, please comment</li> </ul>                             | Tick a box, allows one choice only<br>“Other” allows space for free text |



**Table 1 – Supplementary Data** Referral information of airway clearance services (ACSs) provided, n (%)

| Sources of referrals for ACSs | All data (N=91) |         |              | Private (N=4) |         |              | Public - Metropolitan (N=34) |         |              | Public – Non-metropolitan (N=53) |         |              |
|-------------------------------|-----------------|---------|--------------|---------------|---------|--------------|------------------------------|---------|--------------|----------------------------------|---------|--------------|
|                               | Accept          | Receive | Receive most | Accept        | Receive | Receive most | Accept                       | Receive | Receive most | Accept                           | Receive | Receive most |
| - Private physicians          | 77              | 74      | 14           | 4             | 4       | 3            | 29                           | 30      | 5            | 44                               | 40      | 6            |
| - Public physicians           | (85)            | (81)    | (15)         | (100)         | (100)   | (75)         | (85)                         | (88)    | (15)         | (83)                             | (75)    | (11)         |
| - GPs                         | 84              | 79      | 40           | )             | )       | 0            | 32                           | 33      | 26           | 48                               | 44      | 14           |
| - Nursing staff               | (92)            | (87)    | (44)         | 4             | 2       | (0)          | (94)                         | (97)    | (76)         | (91)                             | (83)    | (26)         |
| - Allied health               | 80              | 80      | 22           | (100)         | (50)    | 1            | 29                           | 29      | 0            | 47                               | 47      | 21           |
| - Respiratory scientists      | (88)            | (88)    | (24)         | )             | 4       | (25)         | (85)                         | (85)    | (0)          | (89)                             | (89)    | (40)         |
| - Home oxygen teams           | 72              | 65      | 6            | 4             | (100)   | 0            | 25                           | 25      | 1            | 43                               | 37      | 5 (9)        |
| - Client self-referred        | (79)            | (71)    | (7)          | (100)         | )       | (0)          | (74)                         | (74)    | (3)          | (81)                             | (70)    | 4 (8)        |
| - Blank                       | 83              | 75      | 5            | )             | 3       | 0            | 31                           | 30      | 1            | 48                               | 42      | 0 (0)        |
|                               | (91)            | (82)    | (5)          | 4             | (75)    | (0)          | (91)                         | (88)    | (3)          | (91)                             | (79)    | 0 (0)        |
|                               | 33              | 12      | 0            | (100)         | 3       | 0            | 11                           | 4       | 0            | 20                               | 8       | 0 (0)        |
|                               | (36)            | (13)    | (0)          | )             | (75)    | (0)          | (32)                         | (12)    | (0)          | (38)                             | (15)    | 3 (6)        |
|                               | 26              | 7       | 0            | 4             | 0       | 0            | 9                            | 4       | 0            | 15                               | 3 (6)   |              |
|                               | (29)            | (8)     | (0)          | (100)         | (0)     | (0)          | (26)                         | (12)    | (0)          | (28)                             | 22      |              |
|                               | 37              | 38      | 0            | )             | 0       | 0            | 11                           | 12      | 0            | 22                               | (42)    |              |
|                               | (41)            | (42)    | (0)          | 2             | (0)     | (0)          | (32)                         | (35)    | (0)          | (42)                             | 3 (6)   |              |
|                               | 0               | 0       | 4            | (50)          | 4       | 0            | 1                            | 1       | 1            | 3                                |         |              |
|                               | (0)             | (0)     | (4)          | 2             | (100)   | (0)          | (3)                          | (3)     | (3)          | (6)                              |         |              |
|                               |                 |         |              | (50)          | )       |              |                              |         |              |                                  |         |              |
|                               |                 |         |              | 4             | 0       |              |                              |         |              |                                  |         |              |
|                               |                 |         |              | (100)         | (0)     |              |                              |         |              |                                  |         |              |
|                               |                 |         |              | )             |         |              |                              |         |              |                                  |         |              |
|                               |                 |         |              | 0             |         |              |                              |         |              |                                  |         |              |
|                               |                 |         |              | (0)           |         |              |                              |         |              |                                  |         |              |

ACS: airway clearance service; GP: general practitioner

**Table 2 – Supplementary Data** Service provision characteristics of airway clearance services (ACSs) provided, n (%)

---

|                                                | All data<br>(N = 91) | Private<br>(N = 4) | Public –<br>Metropolitan<br>(N = 34) | Public - Non-<br>metropolitan<br>(N = 53) | p Value |
|------------------------------------------------|----------------------|--------------------|--------------------------------------|-------------------------------------------|---------|
| Wait time for ACSs                             |                      |                    |                                      |                                           |         |
| Yes                                            | 68 (75)              | 2 (50)             | 29 (85)                              | 37 (70)                                   |         |
| No                                             | 17 (19)              | 2 (50)             | 4 (12)                               | 11 (21)                                   |         |
| Blank                                          | 6 (7)                | 0 (0)              | 1 (3)                                | 5 (9)                                     |         |
| Time allocated to initial ACS appointments     |                      |                    |                                      |                                           |         |
| 15 minutes                                     | 0 (0)                | 0 (0)              | 0 (0)                                | 0 (0)                                     |         |
| 30 minutes                                     | 8 (9)                | 0 (0)              | 2 (6)                                | 6 (11)                                    |         |
| 45 minutes                                     | 16 (18)              | 1 (25)             | 4 (12)                               | 11 (21)                                   |         |
| 60 minutes                                     | 51 (56)              | 1 (25)             | 20 (59)                              | 30 (57)                                   |         |
| >60 minutes                                    | 8 (9)                | 1 (25)             | 6 (18)                               | 1 (2)                                     |         |
| Other <sup>1</sup>                             | 2 (2)                | 1 (25)             | 1 (3)                                | 0 (0)                                     |         |
| Blank                                          | 6 (7)                | 0 (0)              | 1 (3)                                | 5 (9)                                     |         |
| Time allocated to review appointments          |                      |                    |                                      |                                           |         |
| 15 minutes                                     | 0 (0)                | 0 (0)              | 0 (0)                                | 0 (0)                                     |         |
| 30 minutes                                     | 62 (68)              | 3 (75)             | 19 (56)                              | 40 (74)                                   |         |
| 45 minutes                                     | 12 (13)              | 0 (0)              | 7 (21)                               | 5 (9)                                     |         |
| 60 minutes                                     | 10 (11)              | 1 (25)             | 7 (21)                               | 2 (4)                                     |         |
| >60 minutes                                    | 0 (0)                | 0 (0)              | 0 (0)                                | 0 (0)                                     |         |
| Blank                                          | 6 (7)                | 0 (0)              | 1 (3)                                | 5 (9)                                     |         |
| Funding for ACSs                               |                      |                    |                                      |                                           |         |
| Operational budget                             | 44 (48)              | 0 (0)              | 18 (53)                              | 26 (49)                                   |         |
| Activity based funding                         | 33 (36)              | 1 (25)             | 13 (38)                              | 19 (36)                                   |         |
| Do not know                                    | 10 (11)              | 0 (0)              | 3 (9)                                | 7 (13)                                    |         |
| Project / research grant                       | 0 (0)                | 0 (0)              | 0 (0)                                | 0 (0)                                     |         |
| Other <sup>2</sup>                             | 7 (8)                | 3 (75)             | 2 (6)                                | 2 (4)                                     |         |
| Blank                                          | 6 (7)                | 0 (0)              | 1 (3)                                | 5 (9)                                     |         |
| Cost to the client for ACSs                    |                      |                    |                                      |                                           |         |
| No                                             | 72 (79)              | 0 (0)              | 33 (97)                              | 39 (74)                                   | 0.015   |
| Yes                                            | 13 (14)              | 4 (100)            | 0 (0)                                | 9 (17)                                    |         |
| Blank                                          | 6 (7)                | 0 (0)              | 1 (3)                                | 5 (9)                                     |         |
| Airway clearance devices accessible in ACSs    |                      |                    |                                      |                                           |         |
| Bottle PEP                                     | 55 (60)              | 1 (25)             | 23 (68)                              | 31 (58)                                   |         |
| Flutter                                        | 40 (44)              | 3 (75)             | 17 (50)                              | 20 (38)                                   |         |
| Acapella Green                                 | 30 (33)              | 2 (50)             | 16 (47)                              | 12 (23)                                   |         |
| Pari-O-Pep                                     | 27 (30)              | 3 (75)             | 16 (47)                              | 8 (15)                                    |         |
| Aerobika                                       | 23 (25)              | 3 (75)             | 15 (44)                              | 5 (9)                                     |         |
| Pari PEP S                                     | 22 (24)              | 2 (50)             | 13 (38)                              | 7 (13)                                    |         |
| Acapella Choice                                | 18 (20)              | 1 (25)             | 14 (41)                              | 3 (6)                                     |         |
| Therabubble                                    | 17 (19)              | 0 (0)              | 10 (29)                              | 7 (13)                                    |         |
| TheraPEP                                       | 16 (18)              | 1 (25)             | 6 (18)                               | 9 (17)                                    |         |
| Acapella Blue                                  | 15 (16)              | 1 (25)             | 10 (29)                              | 4 (8)                                     |         |
| Aeroeclipse                                    | 13 (14)              | 3 (75)             | 7 (21)                               | 3 (6)                                     |         |
| Turboforte                                     | 12 (13)              | 1 (25)             | 7 (21)                               | 4 (8)                                     |         |
| PARI Sprint                                    | 10 (11)              | 0 (0)              | 8 (24)                               | 2 (4)                                     |         |
| Pari PEP System 1                              | 9 (10)               | 0 (0)              | 5 (15)                               | 4 (8)                                     |         |
| PARI LC Plus                                   | 9 (10)               | 0 (0)              | 6 (18)                               | 3 (6)                                     |         |
| PARI Sprint Star                               | 5 (5)                | 0 (0)              | 4 (12)                               | 1 (2)                                     |         |
| Other <sup>3</sup>                             | 22 (24)              | 1 (25)             | 7 (21)                               | 14 (26)                                   |         |
| Blank                                          | 6 (7)                | 0 (0)              | 1 (3)                                | 5 (9)                                     |         |
| Routine follow up at regular intervals in ACSs |                      |                    |                                      |                                           |         |
| Yes                                            | 11 (12)              | 2 (50)             | 6 (18)                               | 3 (6)                                     |         |
| No                                             | 74 (81)              | 2 (50)             | 27 (79)                              | 45 (85)                                   |         |
| Other <sup>4</sup>                             | 19 (21)              | 1 (25)             | 11 (32)                              | 7 (13)                                    |         |

|                                                              |         |         |         |         |                                              |
|--------------------------------------------------------------|---------|---------|---------|---------|----------------------------------------------|
| Blank                                                        | 6 (7)   | 0 (0)   | 1 (3)   | 5 (9)   |                                              |
| Access to medical professionals for unstable clients in ACSs |         |         |         |         |                                              |
| General Practitioner                                         | 69 (76) | 4 (100) | 22 (65) | 43 (81) | <b>0.000</b><br><b>0.010</b><br><b>0.001</b> |
| Respiratory Physician                                        | 54 (59) | 4 (100) | 29 (85) | 21 (40) |                                              |
| Respiratory Nurse                                            | 49 (54) | 0 (0)   | 25 (74) | 24 (45) |                                              |
| Medical Officer                                              | 34 (37) | 0 (0)   | 10 (29) | 24 (45) |                                              |
| Medical Emergency Team                                       | 34 (37) | 0 (0)   | 21 (62) | 13 (25) |                                              |
| Ambulatory Care Team                                         | 10 (11) | 1 (25)  | 5 (15)  | 4 (8)   |                                              |
| Other <sup>5</sup>                                           | 10 (11) | 1 (25)  | 3 (9)   | 6 (11)  |                                              |
| Blank                                                        | 6 (7)   | 0 (0)   | 1 (3)   | 5 (9)   |                                              |
| Format of education resources provided in ACSs               |         |         |         |         |                                              |
| Paper based                                                  | 83 (91) | 4 (100) | 33 (97) | 46 (87) |                                              |
| Web based                                                    | 38 (42) | 2 (50)  | 19 (56) | 17 (32) |                                              |
| N/A                                                          | 1 (1)   | 0 (0)   | 0 (0)   | 1 (2)   |                                              |
| Blank                                                        | 6 (7)   | 0 (0)   | 1 (3)   | 5 (9)   |                                              |
| Health professionals providing ACSs                          |         |         |         |         |                                              |
| Physiotherapists                                             | 85 (93) | 4 (100) | 33 (97) | 48 (91) | 0.087                                        |
| Respiratory Nurses                                           | 12 (13) | 0 (0)   | 2 (6)   | 10 (19) |                                              |
| Occupational Therapists                                      | 1 (1)   | 0 (0)   | 1 (3)   | 0 (0)   |                                              |
| Exercise Physiologists                                       | 1 (1)   | 0 (0)   | 0 (0)   | 1 (2)   |                                              |
| Blank                                                        | 6 (7)   | 0 (0)   | 1 (3)   | 5 (9)   |                                              |
| Title of physiotherapists providing intervention in ACSs     |         |         |         |         |                                              |
| Cardiorespiratory Physiotherapists                           | 47 (52) | 4 (100) | 30 (88) | 13 (25) | <b>0.000</b>                                 |
| General Physiotherapists                                     | 38 (42) | 0 (0)   | 3 (9)   | 35 (66) |                                              |
| Other <sup>6</sup>                                           | 11 (12) | 0 (0)   | 5 (15)  | 6 (11)  |                                              |
| Blank                                                        | 6 (7)   | 0 (0)   | 1 (3)   | 5 (9)   |                                              |
| Weekly health professional hours spent on ACSs in 2018       |         |         |         |         |                                              |
| <free text>                                                  | 85 (93) | 4 (100) | 33 (97) | 48 (91) |                                              |
| Blank                                                        | 6 (7)   | 0 (0)   | 1 (3)   | 5 (9)   |                                              |
| Administrative support for ACSs                              |         |         |         |         |                                              |
| Yes                                                          | 39 (43) | 2 (50)  | 20 (59) | 17 (32) | <b>0.040</b>                                 |
| No                                                           | 46 (51) | 2 (50)  | 13 (38) | 31 (58) |                                              |
| Blank                                                        | 6 (7)   | 0 (0)   | 1 (3)   | 5 (9)   |                                              |

ACS: airway clearance service; PEP: positive expiratory pressure. For p values <0.05 the values were in bold  
<sup>1</sup>90 minutes'

<sup>2</sup>Private health insurance', 'EPC'

<sup>3</sup>Threshold PEP'

<sup>4</sup>unable due to service constraints', 'patients can make contact if needed'

<sup>5</sup>Emergency Department'

<sup>6</sup>Both generalist and cardiorespiratory'

- 5 and less hours = 50 (Private = 1, metro = 16, non-metro = 33)
- 6-10 hours = 11 (Private = 1, metro = 4, non-metro = 6)
- 11-20 hours = 7 (Private = 1, metro = 4, non-metro = 2)
- 21-30 hours = 3 (Private = 0, metro = 1, non-metro = 2)
- 31-40 hours = 1 (Private = 0, metro = 1, non-metro = 0)
- 41+ hours = 7 (Private = 1, metro = 4, non-metro = 2)

**Table 3 – Supplementary Data** Program metrics of airway clearance services (ACSs), n (%)

|                                                                                      | All data<br>(N = 91) | Private<br>(N = 4) | Public -<br>Metropolitan<br>(N = 34) | Public - Non-<br>Metropolitan<br>(N = 53) |
|--------------------------------------------------------------------------------------|----------------------|--------------------|--------------------------------------|-------------------------------------------|
| Length of time health care utilisation data recorded for before intervention in ACSs |                      |                    |                                      |                                           |
| 3 months                                                                             | 4 (4)                | 0 (0)              | 1 (3)                                | 3 (6)                                     |
| 6 months                                                                             | 2 (2)                | 0 (0)              | 0 (0)                                | 2 (4)                                     |
| 12 months                                                                            | 17 (19)              | 0 (0)              | 12 (35)                              | 5 (9)                                     |
| No health care utilisation data recorded                                             | 62 (68)              | 4 (100)            | 20 (59)                              | 38 (72)                                   |
| Blank                                                                                | 6 (7)                | 0 (0)              | 1 (3)                                | 5 (9)                                     |
| Length of time health care utilisation data recorded for after intervention in ACSs  |                      |                    |                                      |                                           |
| 3 months                                                                             | 2 (2)                | 0 (0)              | 0 (0)                                | 2 (4)                                     |
| 6 months                                                                             | 2 (2)                | 0 (0)              | 1 (3)                                | 1 (2)                                     |
| 12 months                                                                            | 9 (10)               | 0 (0)              | 6 (18)                               | 3 (6)                                     |
| No health care utilisation data recorded                                             | 72 (79)              | 4 (100)            | 26 (76)                              | 42 (79)                                   |
| Blank                                                                                | 6 (7)                | 0 (0)              | 1 (3)                                | 5 (9)                                     |
| Outcome measures used routinely in ACSs                                              |                      |                    |                                      |                                           |
| If yes, please list outcome measures used <sup>1</sup>                               | 85 (93)              | 4 (100)            | 33 (97)                              | 48 (91)                                   |
| Blank                                                                                | 6 (7)                | 0 (0)              | 1 (3)                                | 5 (9)                                     |
| Timing of use of outcome measures in ACSs                                            |                      |                    |                                      |                                           |
| Before and after                                                                     | 64 (70)              | 4 (100)            | 24 (71)                              | 36 (68)                                   |
| No outcome measures used                                                             | 16 (18)              | 0 (0)              | 9 (26)                               | 7 (13)                                    |
| Before only                                                                          | 5 (5)                | 0 (0)              | 0 (0)                                | 5 (9)                                     |
| After only                                                                           | 0 (0)                | 0 (0)              | 0 (0)                                | 0 (0)                                     |
| Blank                                                                                | 6 (7)                | 0 (0)              | 1 (3)                                | 5 (9)                                     |
| Feedback opportunities in ACSs                                                       |                      |                    |                                      |                                           |
| Yes                                                                                  | 79 (87)              | 4 (100)            | 30 (88)                              | 45 (85)                                   |
| No                                                                                   | 6 (7)                | 0 (0)              | 3 (9)                                | 3 (6)                                     |
| Blank                                                                                | 6 (7)                | 0 (0)              | 1 (3)                                | 5 (9)                                     |
| Methods of providing feedback in ACSs                                                |                      |                    |                                      |                                           |
| Written                                                                              | 62 (68)              | 1 (25)             | 21 (62)                              | 40 (75)                                   |
| Verbal                                                                               | 49 (54)              | 3 (75)             | 20 (59)                              | 26 (49)                                   |
| Electronic                                                                           | 14 (15)              | 3 (75)             | 8 (24)                               | 3 (6)                                     |
| N/A                                                                                  | 6 (7)                | 0 (0)              | 3 (9)                                | 3 (6)                                     |
| Blank                                                                                | 6 (7)                | 0 (0)              | 1 (3)                                | 5 (9)                                     |
| Routine correspondence with referrers in ACSs                                        |                      |                    |                                      |                                           |
| Yes                                                                                  | 62 (68)              | 3 (75)             | 24 (71)                              | 35 (66)                                   |
| No                                                                                   | 23 (25)              | 1 (25)             | 9 (26)                               | 13 (25)                                   |
| Blank                                                                                | 6 (7)                | 0 (0)              | 1 (3)                                | 5 (9)                                     |
| Routine correspondence with GPs in ACSs                                              |                      |                    |                                      |                                           |
| Yes                                                                                  | 52 (57)              | 3 (75)             | 18 (53)                              | 31 (58)                                   |
| No                                                                                   | 33 (36)              | 1 (25)             | 15 (44)                              | 17 (32)                                   |
| Blank                                                                                | 6 (7)                | 0 (0)              | 1 (3)                                | 5 (9)                                     |
| Adequate ACSs in regions                                                             |                      |                    |                                      |                                           |
| No <sup>2</sup>                                                                      | 52 (57)              | 2 (50)             | 21 (62)                              | 29 (55)                                   |
| Yes                                                                                  | 33 (36)              | 2 (50)             | 12 (35)                              | 19 (36)                                   |
| Blank                                                                                | 6 (7)                | 0 (0)              | 1 (3)                                | 5 (9)                                     |
| Free text responses (n=45)                                                           |                      |                    | 19 (42)                              | 26 (58)                                   |
| ACSs for other client groups <sup>3</sup>                                            | 34 (37)              | 2 (50)             | 17 (52)                              | 15 (28)                                   |

ACS: airway clearance service; GP: general practitioner.

<sup>1</sup>'DASS', 'MMRC', 'spirometry', 'Borg', 'SNOT', 'LCQ'

<sup>2</sup>Metropolitan – issues are access to devices, delays in service delivery, limited funding and resources, limited home visiting capacity. Non-metro – minimal referrals, lack of staff knowledge, ad hoc services, lack of EFT, patients have to travel+, lack of awareness of utilisation of services.

<sup>3</sup>Neuromuscular diseases and spinal cord injuries

---

**Table 4 Supplementary Data** Themed responses: reasons for airway clearance needs not being met by current service, n

|                                           | Metropolitan<br>(N=18) | Non-metropolitan<br>(N=28) | Total<br>(N=46) |
|-------------------------------------------|------------------------|----------------------------|-----------------|
| Staffing limitation - employment          | 3                      | 8                          | 11              |
| Unable to follow patients up              | 6                      | 5                          | 11              |
| Limited resources (including devices)     | 6                      | 4                          | 10              |
| No designated service / ad hoc            | 2                      | 8                          | 10              |
| Problems with access to existing services | 2                      | 6                          | 8               |
| Funding limitations                       | 3                      | 3                          | 6               |
| Patients not referred                     | 2                      | 4                          | 6               |
| Staffing limitation - expertise           | 0                      | 5                          | 5               |
